# Supplementary material for: An in situ bifacial passivation strategy for flexible perovskite solar module with mechanical robustness by roll-to-roll fabrication
Source: Royal Society of Chemistry journal article supplement (doi:10.1039/d0ta12067g), 2021-01-01
Supplement: d0ta12067g1.pdf [file d0ta12067g1.pdf]

1 **An In-situ Bifacial Passivation Strategy for Flexible**  
2 **Perovskite Solar Module with Mechanical Robustness by**  
3 **Roll-to-roll Fabrication**

4 Hongyu Wang<sup>a</sup>, Zengqi Huang<sup>b</sup>, Shuqin Xiao<sup>a</sup>, Xiangchuan Meng<sup>b</sup>, Zhi Xing<sup>b</sup>, Li  
5 Rao<sup>a</sup>, Chenxiang Gong<sup>b</sup>, Runsheng Wu<sup>c</sup>, Ting Hu<sup>a,b</sup>, Licheng Tan<sup>b</sup>, Xiaotian Hu<sup>\*a,b</sup>,  
6 Shaohua Zhang<sup>\*a</sup>, Yiwang Chen<sup>\*b,d</sup>

7

8 *<sup>a</sup>School of Materials Science and Engineering, Nanchang University, 999 Xuefu*  
9 *Avenue, Nanchang 330031, China.*

10 *<sup>b</sup>College of Chemistry//Institute of Polymers and Energy Chemistry, Nanchang*  
11 *University, Nanchang 330031, P. R. China.*

12 *<sup>c</sup>School of New Energy Science and Engineering, Xinyu University, Xinyu 338004,*  
13 *China*

14 *<sup>d</sup>Institute of Advanced Scientific Research (iASR), Jiangxi Normal University, 99*  
15 *Ziyang Avenue, Nanchang 330022, China.*

16

17 Correspondence should be addressed to C. Y., H. X. and Z. S (email:  
18 ywchen@ncu.edu.cn, happyhu@ncu.edu.cn & shz@ncu.edu.cn).

19

## 20 **Experimental**

21 **NiO<sub>x</sub> NPs synthesis.** Nickel oxide (NiO<sub>x</sub>) nanocomposites (NPs) were synthesized  
22 via a previously reported procedure. Nickel(II) nitrate hexahydrate (Ni(NO<sub>3</sub>)<sub>2</sub>·6H<sub>2</sub>O,  
23 0.5 mol, Sigma-Aldrich, 99.999%) was dissolved in 100 mL of deionized water. Then,  
24 a sodium hydroxide (NaOH) solution (10 mol/L) was added slowly into the solution  
25 to adjust the pH to 10. After stirring for 10 minutes, the colloidal precipitate was  
26 thoroughly cleaned with deionized water. Next, the colloidal precipitate was dried at  
27 80 °C for 6 h and then grinded to powder. Finally, the obtained colloidal precipitation  
28 was calcined at 270 °C for 2 h to obtain a dark-black powder. The NiO<sub>x</sub> NPs were  
29 prepared by dispersing the obtained NiO<sub>x</sub> powder in deionized water at the desired  
30 concentrations.

31 **Preparation of HTL on rigid and flexible substrate.** Glass/ITO and PET/ITO were  
32 ultrasonically cleaned with acetone, abstergent aqueous, deionized water and  
33 isopropyl alcohol for 20 min, and then blown dry by nitrogen (N<sub>2</sub>) and treated with air  
34 plasma for 15 minutes. To fabricate rigid devices, a ~30 nm NiO<sub>x</sub> film was fabricated  
35 by meniscus-coating a solution containing NiO<sub>x</sub> (20 mg/mL) in deionized water (the  
36 blading speed is 10 mm s<sup>-1</sup> and the distance between meniscus and substrate is 50 μm).  
37 And The heating temperature was 55°C. Then, the NiO<sub>x</sub> coated substrates were  
38 annealed at 120 °C for 30 min in air. To fabricate flexible devices and for mechanical  
39 bending measurements, a highly conductive PEDOT:PSS (Heraeus CLEVIOS™  
40 PH1000) aqueous solution with 5 wt% glycol and 0.5 wt% FS-300 was printed onto  
41 the PET substrates by meniscus-coating (the blading speed is 10 mm s<sup>-1</sup> and the  
42 distance between meniscus and substrate is 40 μm), and subsequently annealed at 100  
43 °C for 15 min. Then we used the same process as above to fabricate NiO<sub>x</sub> film. And it  
44 is worth noting that the key to fabricate efficient flexible PSCs is to ensure the  
45 flatness of the flexible substrate during the device fabrication process. After the NiO<sub>x</sub>  
46 film is fully annealed, the surface is treated with the optimal concentration of HI (0.6  
47 wt%, Sigma-Aldrich). Because the NiO<sub>x</sub> film layer is thin, the HI solution can slightly  
48 penetrate into the hc-PEDOT:PSS electrode, thereby playing a role in acidification  
49 and optimizing the conformation of PEDOT:PSS.

50 **Fabrication of perovskite solar cells.** The one-step perovskite solution is prepared  
51 by dissolving 547 mg PbI<sub>2</sub> (99.999% purity, Afa Aesar), 46 mg PbBr<sub>2</sub> (Sigma-  
52 Aldrich), 150 mg FAI (Xi'an p-OLED Corp), 39 mg MAI (>98% purity, Dyesol) and  
53 0.02wt% PU (Sigma-Aldrich) in 1.5 mL anhydrous DMF and 1.5 mL anhydrous  
54 DMSO mixture solvent in glovebox. The perovskite precursor solution is meniscus-  
55 coated on the HTL-coated substrates (the blading speed is 10 mm s<sup>-1</sup> and the distance  
56 between scraper and substrate is 100 μm). Before the film is annealed, it needs to be  
57 vacuum pretreated (vacuum degree below 20 Pa, lasting three minutes). Then, the  
58 perovskite precursor coated substrate is annealed on a hot plate at 150 °C for 15 min.  
59 Subsequently, the PC<sub>61</sub>BM (20 mg/ml in anhydrous chlorobenzene) and BCP (0.5  
60 mg/ml in anhydrous ethanol) are deposited by meniscus coating, sequently. After  
61 drying, the device was completed with the evaporation of Ag contact electrodes (90  
62 nm for small solar cells and 120 nm for solar modues) in a high vacuum level of  
63 1×10<sup>-7</sup>Torr through shadow masks. The preparation process of the test samples is the

64 same as that of the device preparation before evaporation.

65 **R2R Fabrication of all-printing PSCs.** The R2R printing was carried out on a  
66 GTB150B-0602E multifunctional printing machine from Shenzhen Shining  
67 Automation Equipment Co. Ltd. (China). The details of the R2R machine and process  
68 are shown in **Figure 17**. The process was performed with tension control to drive the  
69 web at fixed speed. The winding tension and slit spacing are determined to be 45 N  
70 and 200  $\mu\text{m}$  respectively, air shower is carried out on the printed active layers (The air  
71 shower intensity is 0.1 bar). Before the device fabrication, PET/ITO or PET substrate  
72 were treated by ultrasonic cleaning with acetone, deionized water and isopropanol.  
73 After that, a corona treatment was used to clean and control the wettability. The hc-  
74 PEDOT:PSS transparent electrode was slot-die printed based on our previous work<sup>1</sup>.  
75 The  $\text{NiO}_x$  films were obtained by slot-die with the tape speed of 0.20 m/min, inking  
76 speed of 0.25 ml/min and slit spacing of 200  $\mu\text{m}$ , following by annealing at 120°C for  
77 20 min. After the films were completely dry, immerse it in-situ with HI solution  
78 (0.6wt%) for 10s and annealed at 80 °C for another 10 minutes. Meanwhile, in order  
79 to illustrate whether the interface nickel iodide ( $\text{NiI}_2$ ) can be dissolved in the  
80 perovskite precursor, the solubility of  $\text{NiI}_2$  in DMF was explored, as shown in **Figure**  
81 **S23**. the solubility of  $\text{NiI}_2$  in DMF is very small and it will be further reduced during  
82 the printing process due to the amount of solution. To further illustrate the problem,  
83 we conducted SEM-EDX maps to analyze the element distribution on the surface of  
84 the  $\text{NiO}_x$  (HI) film with and without (DMF) modification (**Figure S24**). The element  
85 content on the surface of the film did not change significantly, and the dissolution of  
86  $\text{NiI}_2$  on the surface of the perovskite precursor can be ignored. Then the active layer of  
87 PSCs was fabricated by slot-die process with the one-step perovskite solution above.  
88 Because of the synergistic of air shower and annealing, the thickness of active layer is  
89 about 300-450 nm, and it will not change obviously with the change of printing  
90 parameters. Then, the sample was transferred to the air knife and purged with nitrogen  
91 for 3 min to remove the solvent. Subsequently, the samples were immediately  
92 annealed at 100 °C for 10 min for testing and characterization. Finally, the  $\text{PC}_{61}\text{BM}$   
93 (20 mg/ml in anhydrous chlorobenzene) and BCP (0.5 mg/ml in anhydrous ethanol)  
94 were deposited by meniscus coating, sequently. After drying, the device was  
95 completed with the evaporation of Ag contact electrodes (90 nm for small solar cells  
96 and 120 nm for solar modues) in a high vacuum level of  $1 \times 10^{-7}$  Torr through shadow  
97 masks.

98 **Fabrication of perovskite solar modules.** The fabrication process of PSMS is  
99 identical to that of small area optoelectronic devices, but their effective areas are  
100 different. The solar module was consisted with 6 sub-cells and the size of a single cell  
101 is 2.5  $\text{cm}^2$  (0.8  $\text{cm} \times 3.1 \text{ cm}$ ), respectively. All the scribing techniques are performed  
102 by the rectification unit, the dislocation of each layer is about 0.2 cm. In addition, the  
103 module interconnection illustration is shown as below. No further encapsulation was  
104 performed on perovskite solar cells and modules.

105 **Film characterizations.** The morphology of films was measured by SEM (JEOL,  
106 JSM-7500F, 104 Japan) at an accelerating voltage of 5.0 kV and AFM (nanoscope  
107 multimode Bruker). X-ray diffraction (XRD) and 2D-XRD measurements were

108 recorded by using a D8-Discover 25 diffractometer (Bruker). The steady-state  
109 photoluminescence (PL) and time-resolved photoluminescence (TRPL) measurements  
110 at the peak emission of  $\sim 680$  nm (on the excitation at 550 nm) were carried out by a  
111 steady state and lifetime spectrometer (FLS920, Edinburgh Instruments Ltd.). The  
112 TRPL excitation fluence is  $\approx 4$  nJ cm<sup>-2</sup> from a 405 pulsed laser with a wavelength of  
113  $405 \pm 8$  nm and pulse width of 45 ps, at a repetition rate of 0.1 MHz. The PL decay  
114 data was recorded using time-correlated single photon counting technique. The  
115 ultraviolet-visible (UV-Vis) spectra are recorded by SHIMADZU, UV-2600  
116 spectrophotometer. XPS studies were performed on a Thermo-VG Scientific  
117 ESCALAB 250 photoelectron spectrometer using a monochromated AlK $\alpha$  (1486.6 eV)  
118 X-ray source. All recorded peaks were corrected for electrostatic effects by setting the  
119 C-C component of the C 1s peak to 284.8 eV. The base pressure in the XPS analysis  
120 chamber was  $2 \times 10^{-9}$  mbar. The dual-beam ToF-SIMS depth profiling measurements  
121 were performed on a ToF-SIMS 5 instrument (ION-TOF GmbH) in an interlaced  
122 mode. A pulsed 30 keV Bi<sup>+</sup> ion beam was used as the analysis beam with the beam  
123 current of 1.08 pA.

124 **Solar cells characterizations.** The electrical impedance spectroscopy (EIS) was  
125 tested at Zahner electrochemical workstation. The current density-voltage (J-V) and  
126 current-voltage (I-V) curves were characterized using Keithley 2400. The illuminated  
127 currents were measured under the simulated 100 mW cm<sup>-2</sup> and AM 1.5 G irradiation  
128 (Enli Tech). The reference silicon solar cell was corrected from NREL. All  
129 measurements were performed in a nitrogen glove box. The forward scan range is  
130 from 0 V to 1.2 V and the reverse scan range is from 1.2 V to 0 V, with 8.0 mV for  
131 each step. The scan rate is 200 mV s<sup>-1</sup> and the delay time is 30 ms. The incident  
132 photon-to-current conversion efficiency (IPCE) spectra were detected under  
133 monochromatic illumination (Oriel Cornerstone 260 1/4 m monochromator equipped  
134 with Oriel 70613NS QTH lamp), and the calibration of the incident light was  
135 performed with a monocrystalline silicon diode. The repeated bending cycle tests  
136 were completed by a stretching machine (Beijing Zhongke J&M). All the results of  
137 bending test were averaged from over 100 samples.

138

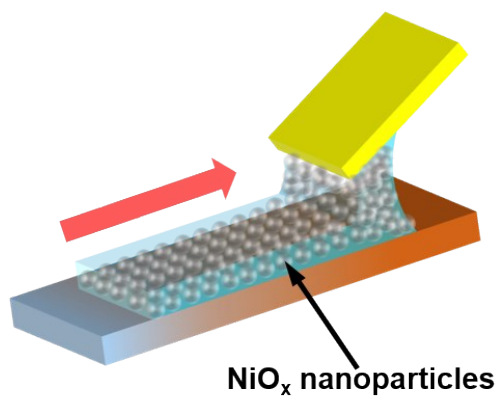

139

140 **Fig. S1.** The schematic diagram of fabricating NiO<sub>x</sub> film by blade coating.

141

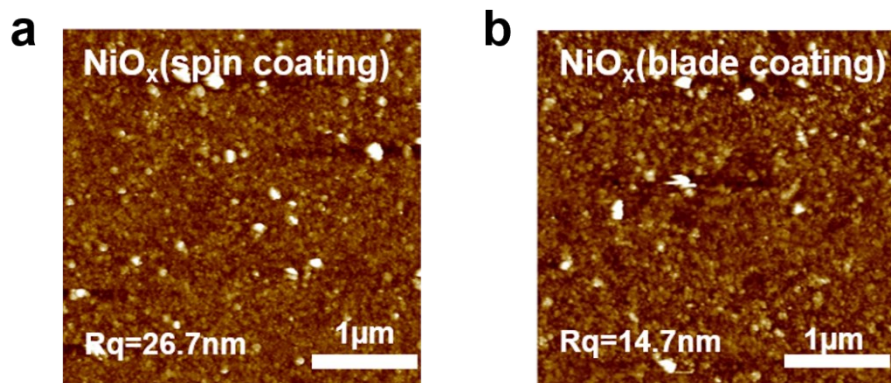

142

143

144 **Fig. S2.** Atomic force microscopy (AFM) images of NiO<sub>x</sub> film based on spin-coating  
145 and blade-coating process. The film morphology becomes smoother by blade-coating  
146 process.

147

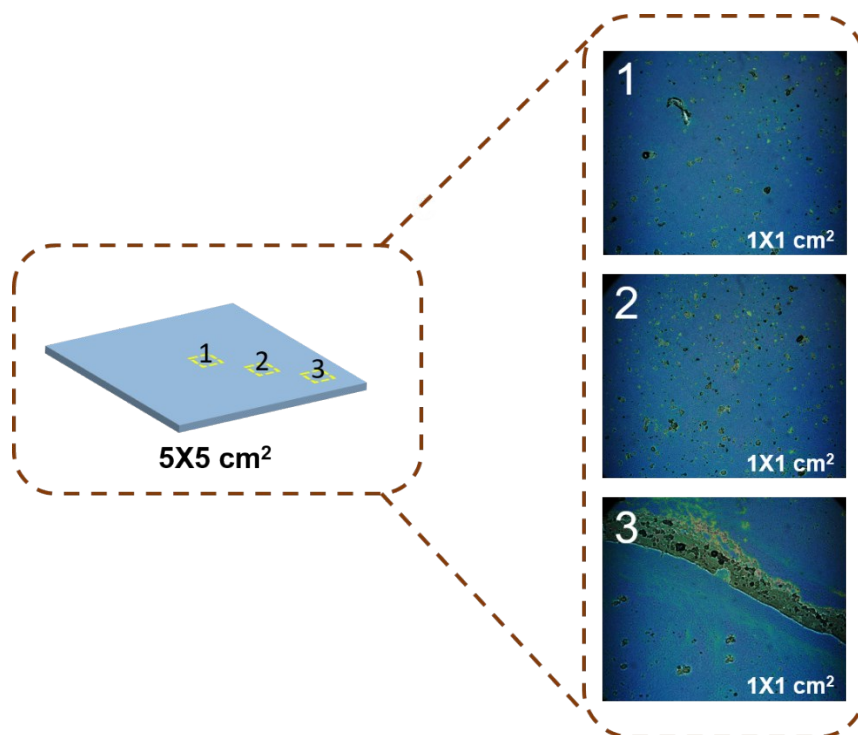

148

149

150 **Fig. S3.** Optical microscope (OM) images of NiO<sub>x</sub> nanoparticles spin-coated on a  
151 rigid substrate of 25 cm<sup>2</sup>. Areas 1, 2 and 3 are the measuring selection.

152

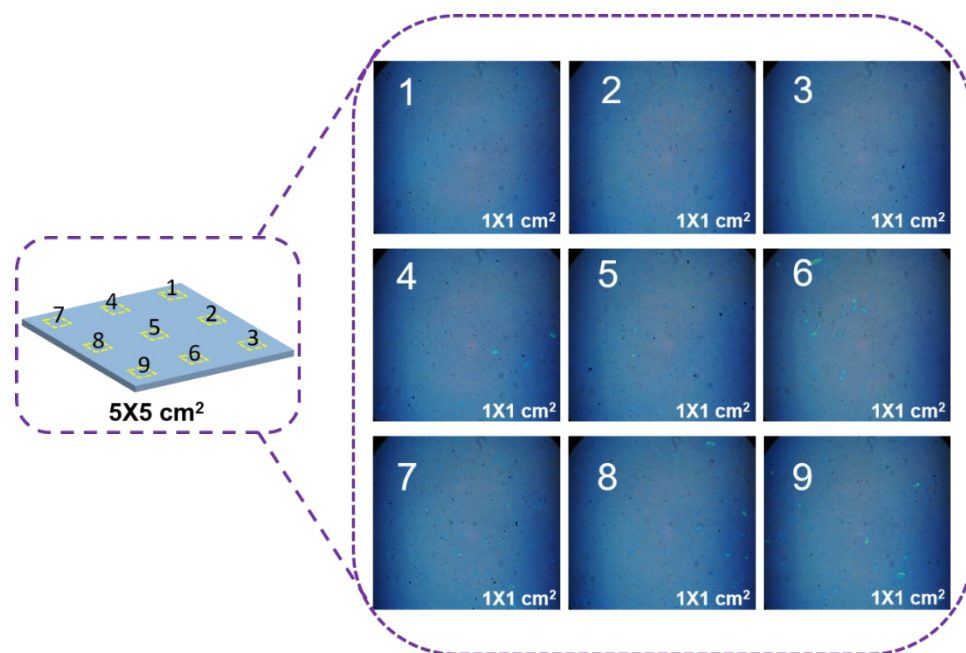

153

154 **Fig. S4.** Optical microscope (OM) images of NiO<sub>x</sub> nanoparticles spin-coated on a  
 155 rigid substrate of 25 cm<sup>2</sup>. Areas 1-9 are the measuring selection.

156

157 In order to prove that the blade-coating process is more conducive to the formation of  
 158 a uniform NiO<sub>x</sub> film than the spin-coating process, atomic force microscopy (AFM)  
 159 and optical microscopy (OM) are detected to characterize the morphology of the NiO<sub>x</sub>  
 160 films. The NiO<sub>x</sub> films are deposited on a rigid substrate of 25 cm<sup>2</sup>. As shown in  
 161 **Figure S2**, the NiO<sub>x</sub> films fabricated by blade-coating process present smooth surface  
 162 roughness, and its surface roughness value (14.7nm) is about half that (26.7nm) of the  
 163 films fabricated by spin-coating process. This result indicates that the NiO<sub>x</sub>  
 164 nanoparticles will be distributed on the substrate in an orderly manner due to the  
 165 solution shear force during the blade-coating process, thereby obtaining a uniform and  
 166 flat film. In addition, to prove the above conclusion more intuitively, optical  
 167 microscope (OM) images of the surface of the NiO<sub>x</sub> film are collected. In order to  
 168 reflect the reliability of the data, the different selected areas (1cm<sup>2</sup>) of the NiO<sub>x</sub> film  
 169 are measured. As shown in **Figure S3** and **S4**, the NiO<sub>x</sub> film fabricated by spin  
 170 coating has obvious aggregation outside the central area. On the contrary, the film  
 171 fabricated by blade coating is relatively uniform on the entire substrate. This  
 172 consequence is consistent with the data analysis of AFM. Thus, it is easier to prepare  
 173 a large-area uniform film by the blade-coating process, which endows the basis for  
 174 enhanced performance of large-area PSCs.

175



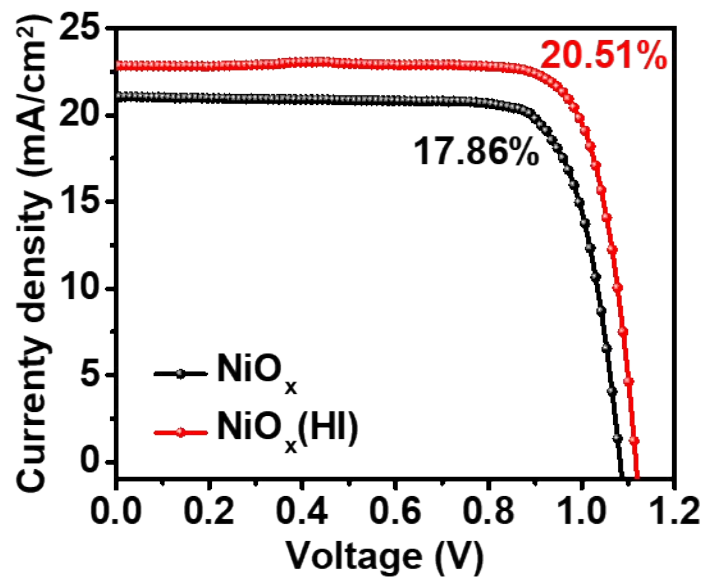

176

177 **Fig. S5.** Typical  $J$ - $V$  curves of a small area rigid device based on NiO<sub>x</sub> and NiO<sub>x</sub> (HI)  
178 HTLs. A significant PCE improvement can be observed when using the optimal  
179 concentration (0.6wt %) of HI solution treats on the NiO<sub>x</sub> film.

180

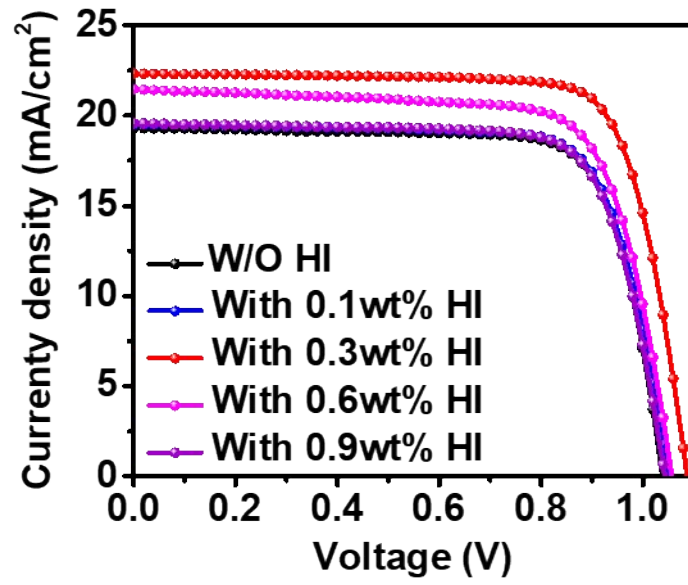

181

182 **Fig. S6.** Typical  $J$ - $V$  curves of PSCs based on different concentration of HI solution  
183 treated  $\text{NiO}_x$  film.

184

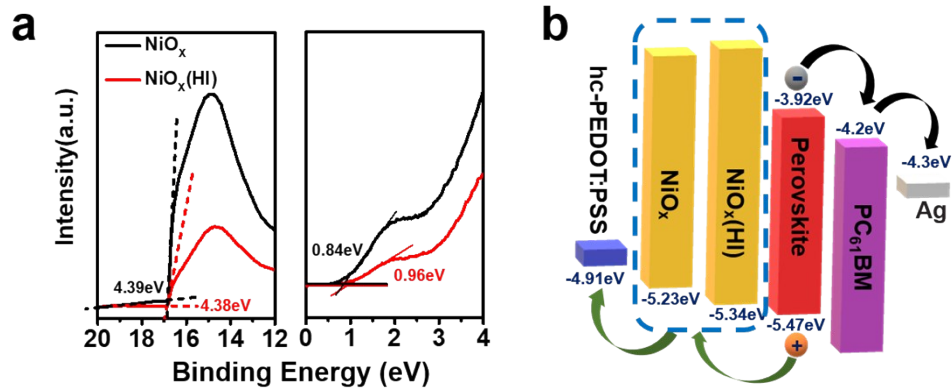

185

186 **Fig. S7.** a) Ultraviolet photoelectron spectroscopy (UPS) spectra for  $\text{NiO}_x$  films with  
 187 and without HI surface modification. b) Energy level diagram of the perovskite solar  
 188 cells (data for the corresponding  $\text{NiO}_x$  films and perovskite layers are provided by  
 189 UPS measurement).

190

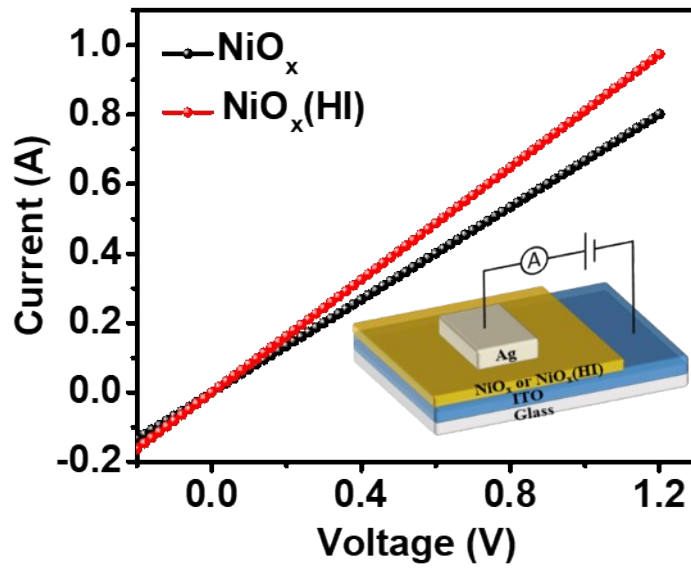

192

193 **Fig. S8.** The current-voltage ( $I$ - $V$ ) plots of hole only devices with unmodified and HI-  
 194 modified  $\text{NiO}_x$  hole extraction layers. The inset shows the device structures:  
 195 ITO/ $\text{NiO}_x$ /Ag or ITO/ $\text{NiO}_x$  (HI)/Ag.

196

197 We determined the conductivity of the  $\text{NiO}_x$  films by the following equation:

$$198 \quad \sigma = D / (AR) \quad (1)$$

199 Where  $\sigma$  is the conductivity,  $A$  is the active area ( $1 \times 1 \text{ cm}^2$ ),  $D$  is the thickness of the  
 200 film, and  $R$  is the resistance obtained from the current-voltage ( $I$ - $V$ ) curves.<sup>2</sup>

201

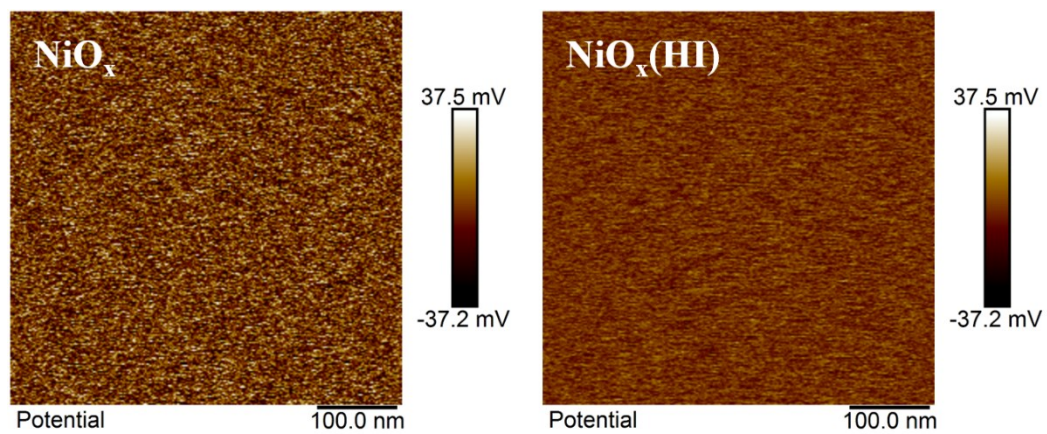

202

203 **Fig. S9.** Kelvin probe force microscopy (KPFM) images of  $\text{NiO}_x$  films without and  
204 with HI surface modification.

205

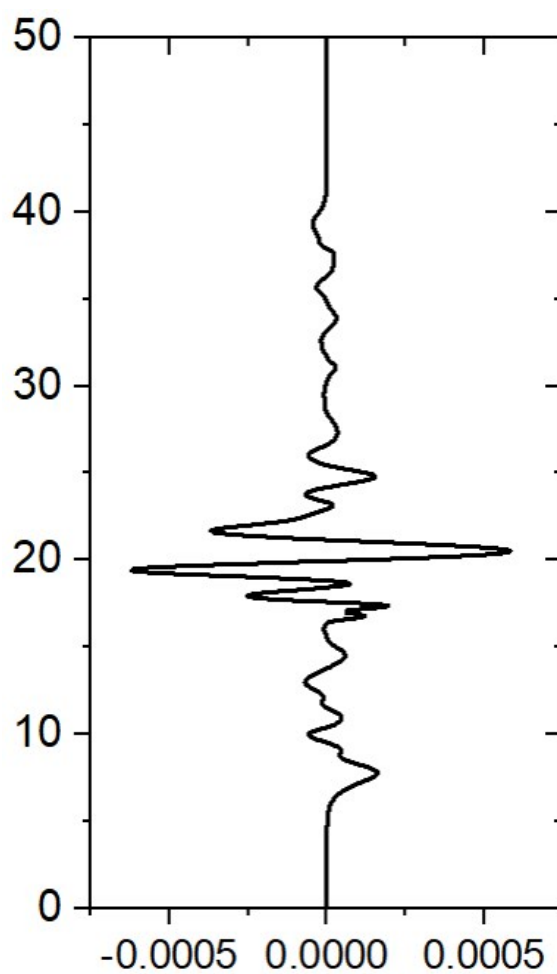

207

208 **Fig. S10.** Integration of  $\Delta\rho$  in planes parallel to the surface and plotted as a function  
209 of the  $z$  coordination.  $\Delta\rho$  represents the differential charge density, and its calculation  
210 formula is as follows:  $\Delta\rho = \rho(\text{perovskite}/\text{NiI}_2) - \rho(\text{perovskite}) - \rho(\text{NiI}_2)$ .

211

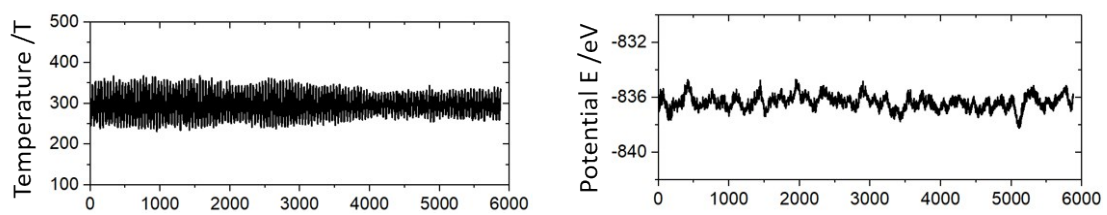

212

213 **Fig. S11.** Variations of temperature and energy against the time for AIMD  
214 simulations of NiI<sub>2</sub>/perovskite.

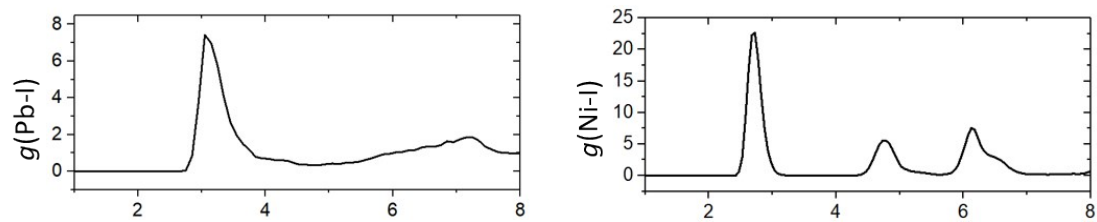

215

216 **Fig. S12.** Radical distribution function of Pb-I and Ni-I.

217



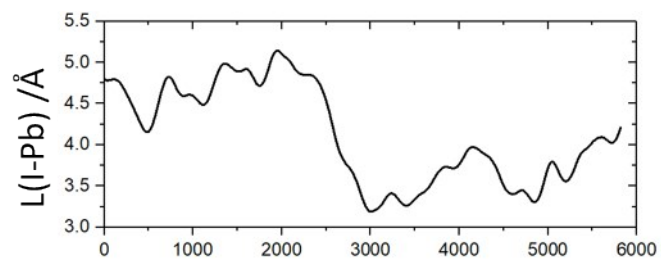

218

219 **Fig. S13.** The Pd-I bond pair distance against the time for AIMD simulations.

220

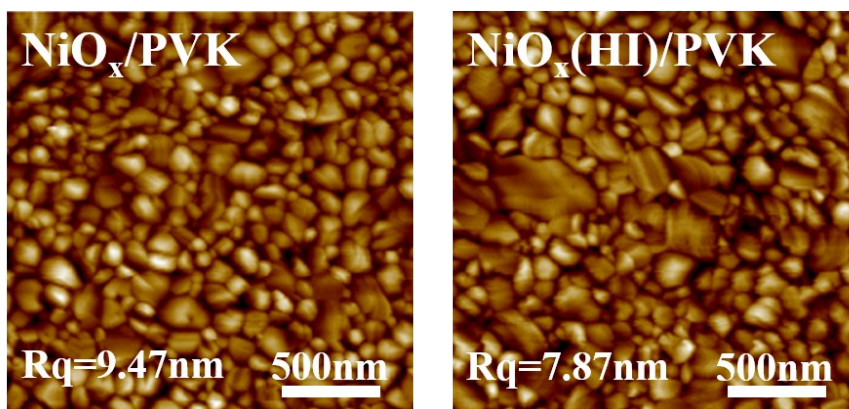

221

222 **Fig. S14.** Atomic force microscope (AFM) images of perovskite films based on  $\text{NiO}_x$   
223 and  $\text{NiO}_x(\text{HI})$  as hole transport layer (HTL).

224

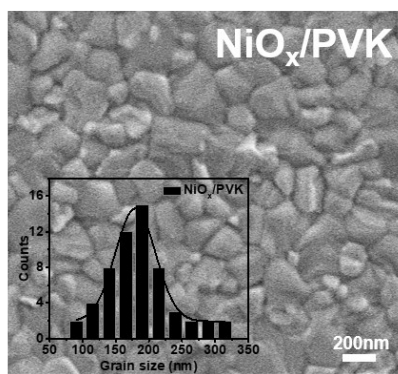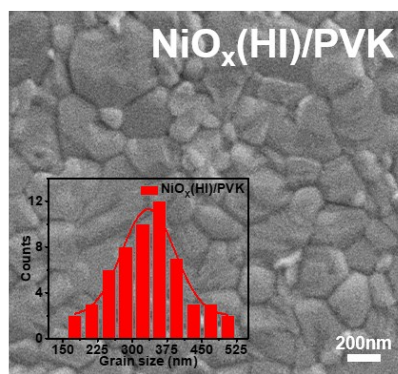

225

226 **Fig. S15.** The top-view SEM images of flexible perovskite films based on NiO<sub>x</sub> and  
 227 NiO<sub>x</sub> (HI) HTL. The embedded histogram shows the distribution of the corresponding  
 228 perovskite grain size.

229

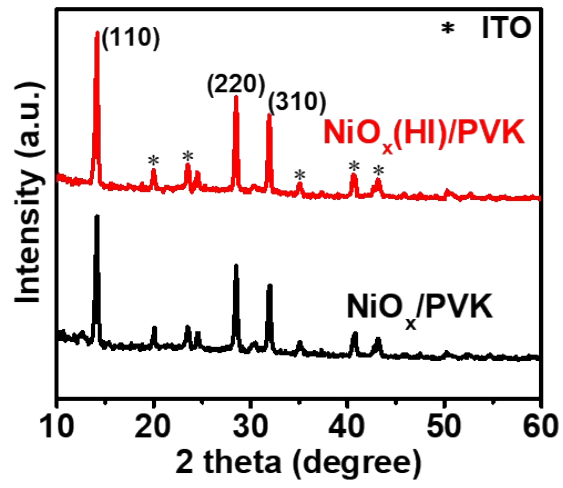

230

231 **Fig. S16** X-ray diffraction (XRD) patterns of  $\text{NiO}_x$  films with and without HI  
232 treatment.

233

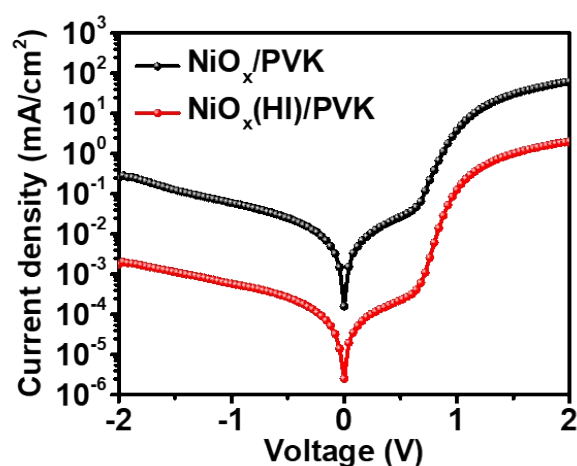

234

235 **Fig. S17** Dark  $J$ - $V$  curves of the PSCs for  $\text{NiO}_x$  and  $\text{NiO}_x$  (HI) as HTL.

236

237 As shown in Figure S15, dark  $J$ - $V$  curves are characterized to investigate the transport  
 238 performance of photogenerated carriers. the lower dark current density for the device  
 239 based on HI interface modification indicates that the more photogenerated carriers can  
 240 be transmitted efficiently through the perovskite films rather than directly diverged,  
 241 which results in the effective suppression of charge carrier recombination and leakage  
 242 current. The above results suggest that HI interface modification can indeed reduce  
 243 the trap-assisted bimolecular recombination, which also means the better perovskite  
 244 film quality and interfacial ohmic contact.

245

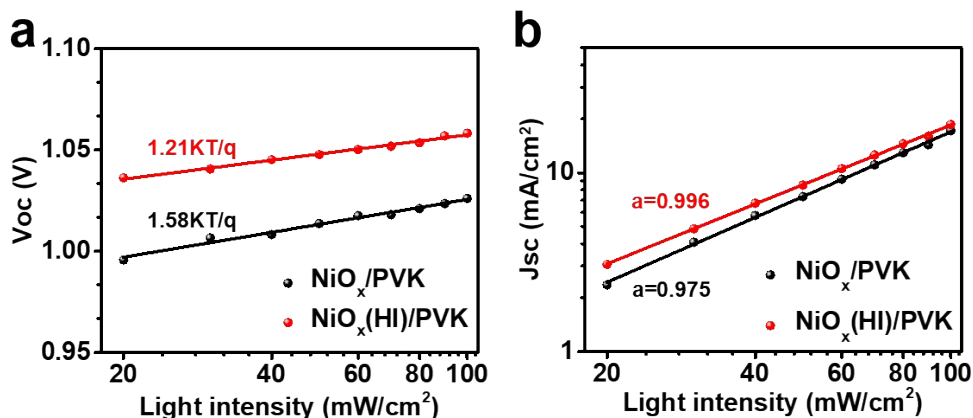

246  
 247 **Fig. S18.** a)  $V_{oc}$  and b)  $J_{sc}$  dependence of the PSCs prepared on  $NiO_x$  and  $NiO_x$  (HI)  
 248 substrates at various illumination intensities.

249

250 Then, the details of carrier recombination are further investigated by measuring  $J$ - $V$   
 251 curve under various illumination intensities. The slope of  $V_{oc}$  versus illumination  
 252 intensity produced  $kT/q$  (where  $k$  is the Boltzmann constant,  $T$  is the temperature in  
 253 kelvin, and  $q$  is the elementary charge).<sup>3</sup> As shown in **Figure S16a** (Supporting  
 254 Information), the slope of the device decreases from  $1.58 kT/q$  (reference) to  $1.21 kT/$   
 255  $q$ , which indicates that the trap-assisted recombination is effectively reduced under  
 256 open-circuit conditions. Accordingly, the power law dependence of  $J_{sc}$  on the  
 257 illumination intensity can be defined as  $J_{sc} \propto I^\alpha$  (where  $I$  and  $\alpha$  are the light intensity and  
 258 exponential factor, respectively) (**Figure S16b**, Supporting Information).<sup>[2]</sup> The value  
 259 of  $\alpha$  for the HI-treated device (0.996) is higher than those of the reference device  
 260 (0.975), demonstrating a reduction in the bimolecular recombination under short-  
 261 circuit conditions.

262

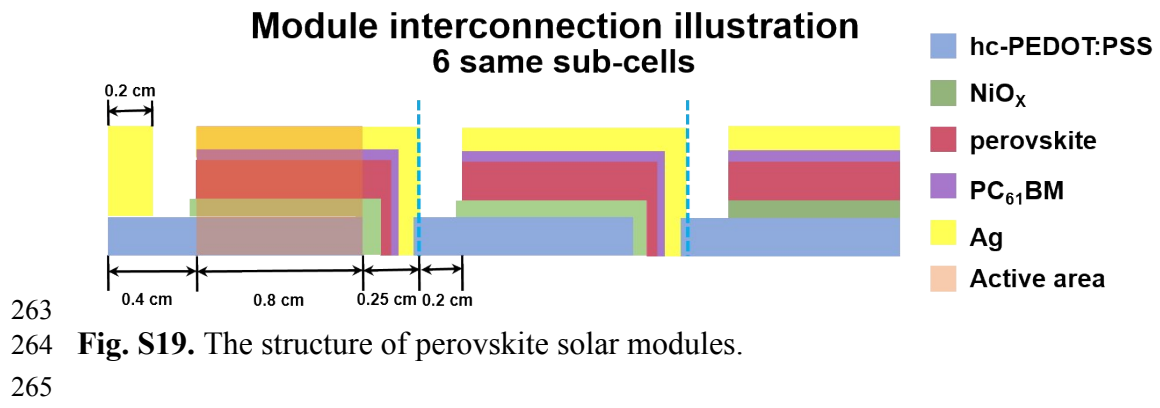

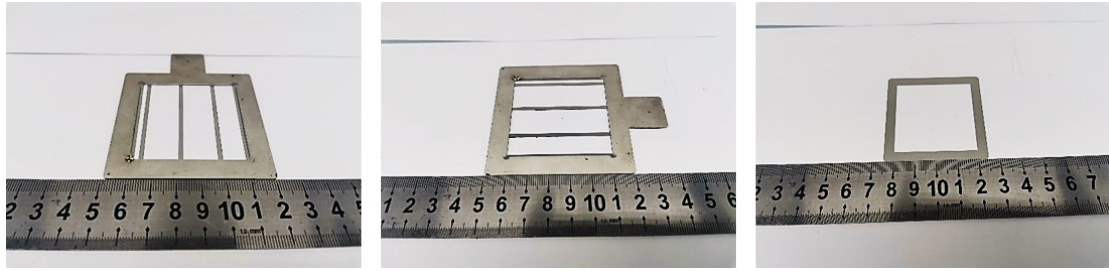

266

267 **Fig. S20.** The mask plate for device vapor deposition of silver and the shading plate  
268 for  $J$ - $V$  curve measurement. These are used to determine the effective area of the large  
269 area module.

270



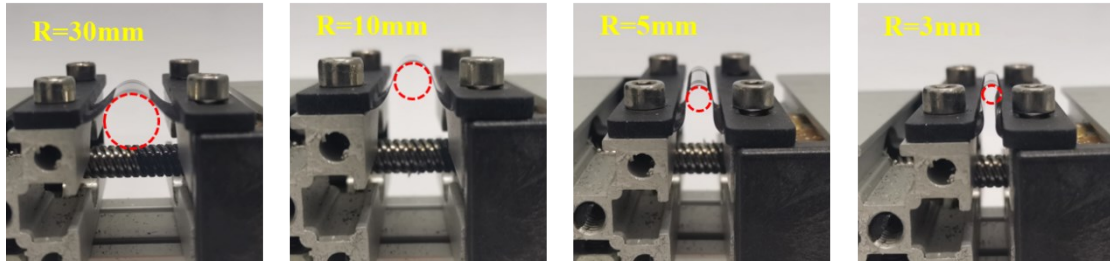

271

272 **Fig. S21.** Photographs of flexible devices under different bending radii.

273

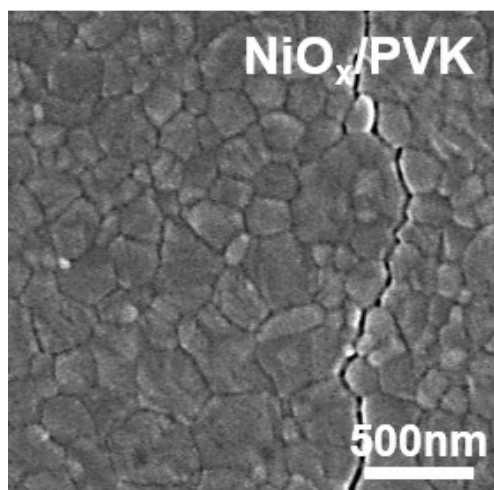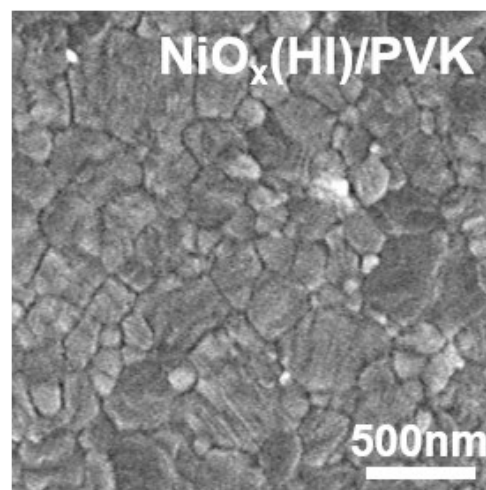

274

275 **Fig. S22.** The top-view SEM images of the flexible device after 5000 bends under a  
276 bending radius of 3mm. The devices without HI acid treatment of the NiO<sub>x</sub> film show  
277 obvious cracks. On the contrary, the devices with NiO<sub>x</sub> (HI) as the HTL do not  
278 produce obvious cracks.

279

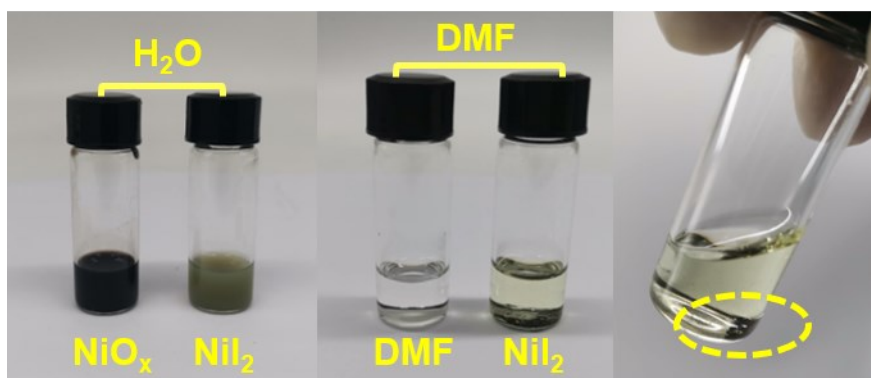

280

281 **Fig. S23.** Photographs of the solubility of nickel iodide ( $\text{NiI}_2$ ) in water and DMF.

282

283 As shown in Figure S23, the solubility of  $\text{NiI}_2$  in DMF is very small and it will be  
284 further reduced during the printing process due to the amount of solution. To further  
285 illustrate the problem, we SEM-EDX maps to analyze the element distribution on the  
286 surface of the  $\text{NiO}_x$  (HI) film with and without (DMF) modification (Figure S24).  
287 The element content on the surface of the film did not change significantly, and the  
288 dissolution of  $\text{NiI}_2$  on the surface of the perovskite precursor can be ignored.

289

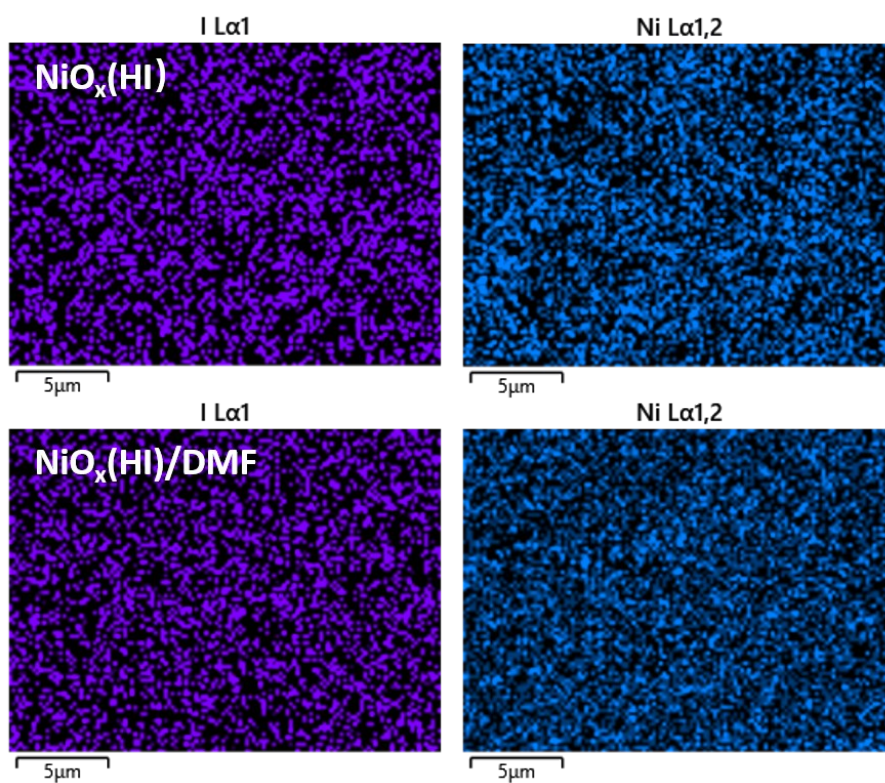

290

291 **Fig. S24.** SEM- EDX maps of I and Ni elements for  $\text{NiO}_x(\text{HI})$  film with and without  
292 N, N-Dimethylformamide (DMF) modification.

293

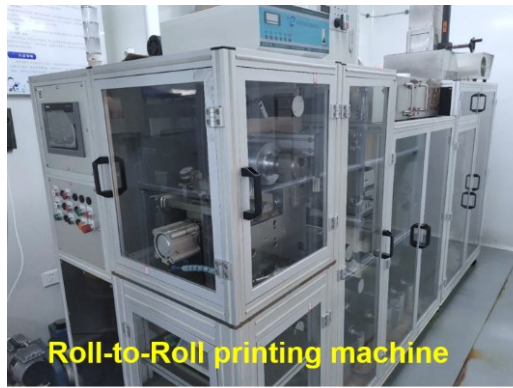

Roll-to-Roll printing machine

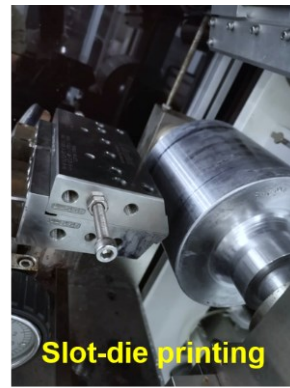

Slot-die printing

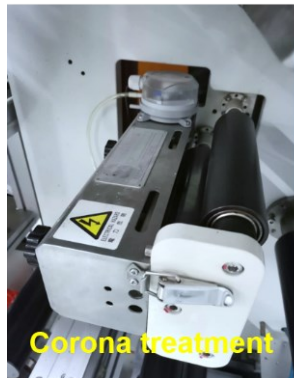

Corona treatment

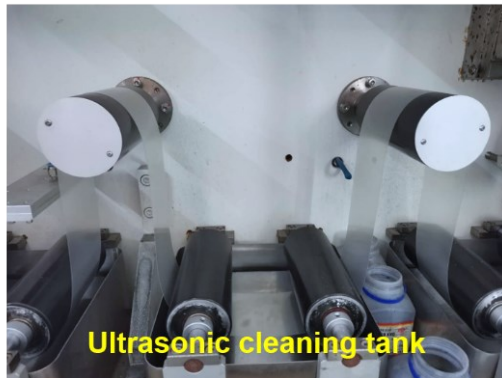

Ultrasonic cleaning tank

294

295 **Fig. S25.** Photographs of roll-to-roll printing machine and main processing  
296 components in the printing process.

297

298 **Table S1.** The parameters derived from the typical  $J$ - $V$  curves of flexible PSCs based  
299 on different concentration of HI treated NiO<sub>x</sub> substrates.

| <b>Device</b>                 | <b><math>V_{oc}</math> (V)</b> | <b><math>J_{sc}</math> (mA/cm<sup>2</sup>)</b> | <b>FF (%)</b> | <b>PCE (%)</b> |
|-------------------------------|--------------------------------|------------------------------------------------|---------------|----------------|
| NiO <sub>x</sub>              | 1.04                           | 19.31                                          | 76.58         | 15.38          |
| NiO <sub>x</sub> (HI 0.1 wt%) | 1.04                           | 19.57                                          | 75.76         | 15.48          |
| NiO <sub>x</sub> (HI 0.3 wt%) | 1.04                           | 19.52                                          | 76.66         | 15.57          |
| NiO <sub>x</sub> (HI 0.6 wt%) | 1.09                           | 22.32                                          | 78.26         | 19.04          |
| NiO <sub>x</sub> (HI 0.9 wt%) | 1.06                           | 21.45                                          | 73.52         | 16.72          |

300

301 **Table S2.** The parameters derived from the typical  $J$ - $V$  curves of flexible PSCs based  
302 on 0.6 wt% HI treated NiO<sub>x</sub> substrates.

| Device                |         | $V_{oc}$ (V) | $J_{sc}$ (mA/cm <sup>2</sup> ) | FF (%)     | PCE (%)    |
|-----------------------|---------|--------------|--------------------------------|------------|------------|
| NiO <sub>x</sub>      | forward | 0.96         | 19.33                          | 76.10      | 14.15      |
|                       | reverse | 1.04         | 19.31                          | 76.59      | 15.38      |
|                       | Average | 1.01±0.04    | 19.11±0.24                     | 76.10±0.51 | 14.56±0.85 |
| NiO <sub>x</sub> (HI) | forward | 1.09         | 22.14                          | 77.89      | 18.80      |
|                       | reverse | 1.09         | 22.32                          | 78.26      | 19.04      |
|                       | Average | 1.07±0.02    | 22.12 ±0.21                    | 77.90±0.37 | 18.62±0.43 |

303 The average and standard deviation values are based on 50 cells and the “±” is  
304 defined as the error bar.

305

306 **Supplementary Note 1.**

307 **Gibbs free energy theory for judging the progress of chemical reactions:** the

308 corresponding chemical reaction equation is as follows:

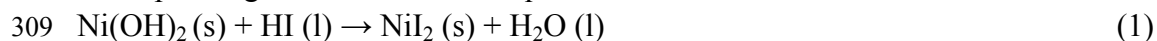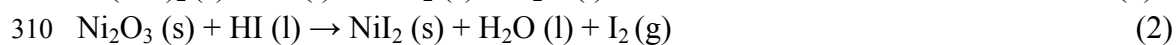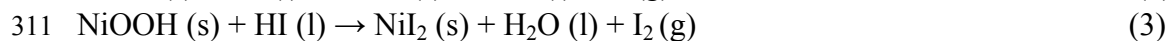

312 The first equation is the acid-base neutralization reaction. Nickel hydroxide is a  
313 reducing hydroxide, which has strong alkalinity and can be dissolved in acid.

314 Moreover, according to the Gibbs free energy calculation formula:

315  $\Delta G = \Sigma\Delta G_1 - \Sigma\Delta G_2$

316 where  $\Sigma\Delta G_1$  represents the sum of Gibbs free energy of each product, and  $\Sigma\Delta G_2$   
317 represents that of each reactant, the calculated value of  $\Delta G$  is  $-185.988 \text{ kJ mol}^{-1}$   
318 ( $\Delta G < 0$ ), indicating that the reaction can proceed forward.

319 In reaction equations 2 and 3, trivalent nickel ions have strong oxidizing properties  
320 and can rapidly undergo oxidation-reduction reactions with acid radical ions in water.

321 In addition, the progress of the reaction can also be judged by the Gibbs free energy  
322 calculation formula:

323  $\Delta G = \Delta H - T\Delta S$

324 where  $\Delta H$  represents the enthalpy change of the reaction, T is the reaction temperature,  
325 and  $\Delta S$  represents the entropy change of the reaction. Calculated according to the  
326 query chemistry manual, the enthalpy change values ( $\Delta H$ ) of reactions 2 and 3 are  
327 correspondingly  $-609.24 \text{ kJ mol}^{-1}$  and  $-559.3 \text{ kJ mol}^{-1}$  ( $\Delta H < 0$ ). At the same time,  
328 according to the physical meaning of entropy, it can be known that the entropy value  
329 is related to the disorder of the reaction system. Reactions 2 and 3 both emit gas based  
330 on redox reactions, indicating that the disorder of the system is increasing, that is, the  
331 entropy value increases ( $\Delta S > 0$ ). Therefore, according to the above Gibbs free energy  
332 formula, it is judged that the  $\Delta G$  values of reactions 2 and 3 are negative ( $\Delta G < 0$ ),  
333 indicating that the above reactions can proceed in a positive direction.

334



335 **References**

- 336 1. X. Hu, Z. Huang, X. Zhou, P. Li, Y. Wang, Z. Huang, M. Su, W. Ren, F. Li, M.  
337 Li, Y. Chen, Y. Song, *Adv. Mater.* 2017, **29**, 1703236.
- 338 2. B. Parida, S. Yoon, J. Ryu, S. Hayase, S. M. Jeong, Dong-Won Kang, *ACS Appl.*  
339 *Mater. Interfaces.* 2020, **12**, 22958.
- 340 3. V. D. Mihailetschi, H. Xie, B. Deboer, L. J. A. Koster, P. W. M. Blom, *Adv.*  
341 *Funct. Mater.* 2006, **16**, 699.
